# Supplementary material
Source: Springer Nature journal article supplement (https://www.springermedizin.de/resource/supplementary/12872_2001_10_MOESM1_ESM.pdf/9430850)
Supplement: MOESM1 [file 9430850]

# THE YORK ANGINA BELIEFS QUESTIONNAIRE (version 1)

We want to know your views and beliefs about why people get angina and what they should do about it.

It is important that you answer every question. Don't spend too long thinking about your answers - the first thing you thought of is what we want to know.

For each question please tick one circle. Please don't leave any out.

|                                                                                              | STRONGLY<br>AGREE     | AGREE                 | DISAGREE              | STRONGLY<br>DISAGREE  | I DON'T HAVE<br>ANY IDEA<br>ABOUT THIS |
|----------------------------------------------------------------------------------------------|-----------------------|-----------------------|-----------------------|-----------------------|----------------------------------------|
| 1. People with angina must stop what they are doing when they get angina pain                | <input type="radio"/>                  |
| 2. Angina is a kind of small heart attack                                                    | <input type="radio"/>                  |
| 3. People develop angina because they have too much stress in their lives                    | <input type="radio"/>                  |
| 4. People with angina should take life easy                                                  | <input type="radio"/>                  |
| 5. People who work too hard are likely to develop angina                                     | <input type="radio"/>                  |
| 6. People with angina should always avoid things that bring it on                            | <input type="radio"/>                  |
| 7. It's not advisable for people with angina to exercise                                     | <input type="radio"/>                  |
| 8. Any sort of excitement is bad for people with angina                                      | <input type="radio"/>                  |
| 9. Angina is caused by a worn out heart                                                      | <input type="radio"/>                  |
| 10. If people with angina don't rest when they get angina pain it could be fatal             | <input type="radio"/>                  |
| 11. People with angina must stay calm                                                        | <input type="radio"/>                  |
| 12. There's nothing people with angina can do about it, they just have learn to live with it | <input type="radio"/>                  |
| 13. Rest is the best treatment for angina                                                    | <input type="radio"/>                  |
| 14. Too much worry causes people to develop angina                                           | <input type="radio"/>                  |
| 15. Angina pain causes permanent damage to the heart                                         | <input type="radio"/>                  |
| 16. It's not safe to argue with people who have angina.                                      | <input type="radio"/>                  |
